# Supplementary material for: Treating Restless Legs Syndrome Was Associated With Low Risk of Cardiovascular Disease: A Cohort Study With 3.4 Years of Follow‐Up
Source: PubMed Central journal article supplement — J Am Heart Assoc. 2021 Feb 8;10(4):e018674. doi: 10.1161/JAHA.120.018674 (PMC7955352; doi:10.1161/jaha.120.018674), 2021-02-08
Supplement: JAH3-10-e018674-s001.pdf [file JAH3-10-e018674-s001.pdf]

# **SUPPLEMENTAL MATERIAL**

**Table S1. ICD-9 codes or procedure code used to define cardiovascular diseases.**

| <b>cardiovascular disease</b>                 | <b>2015 ICD-9-CM Diagnosis Codes</b> |
|-----------------------------------------------|--------------------------------------|
| Myocardial infarction                         | 410                                  |
| Angina                                        | 411, 413                             |
| Other forms of chronic ischemic heart disease | 414.0, 414.8, 414.9                  |
| Coronary artery bypass grafting               | 36.1 (2015 ICD-9-CM Procedure Codes) |
| Percutaneous coronary intervention            | 36.0 (2015 ICD-9-CM Procedure Codes) |
| Atrial fibrillation                           | 427.3                                |
| Heart failure                                 | 428                                  |
| Ischemic stroke                               | 433, 434, 436                        |
| Hemorrhagic stroke                            | 431,432                              |
| Subarachnoid hemorrhage                       | 430                                  |
| Other or unspecified stroke                   | 435                                  |

**Table S2. Restless legs syndrome treatment.**

| <b>DRUG NAME</b>                                   | <b>GROUP</b>    |
|----------------------------------------------------|-----------------|
| Acetaminophen/codeine Phosphate                    | Opiates         |
| Acetaminophen/hydrocodone Bitartrate               | Opiates         |
| Acetaminophen/oxycodone Hydrochloride              | Opiates         |
| Aspirin/oxycodone Hydrochloride                    | Opiates         |
| Codeine Phos/dexbrompheniramine Maleate/pse Hcl    | Opiates         |
| Codeine Phos/dexchlorpheniramine Mal/phenyleph Hcl | Opiates         |
| Codeine Phos/gg/pse Hcl                            | Opiates         |
| Codeine Phos/phenyleph Hcl/promethazine Hcl        | Opiates         |
| Codeine Phos/phenyleph Hcl/pyril Mal               | Opiates         |
| Codeine Phosphate/guaifenesin                      | Opiates         |
| Codeine Phosphate/phenylephrine Hydrochloride      | Opiates         |
| Codeine Phosphate/promethazine Hydrochloride       | Opiates         |
| Codeine Phosphate/pseudoephedrine Hydrochloride    | Opiates         |
| Codeine Sulfate                                    | Opiates         |
| Hydrocodone Bitartrate                             | Opiates         |
| Hydrocodone Bitartrate/ibuprofen                   | Opiates         |
| Hydrocodone Bitartrate/phenylephrine Hydrochloride | Opiates         |
| Hydrocodone Bitartrate/potassium Guaiacolsulfonate | Opiates         |
| Hydrocodone Tannate/pseudoephedrine Tannate        | Opiates         |
| Methadone Hydrochloride                            | Opiates         |
| Oxycodone Hydrochloride                            | Opiates         |
| Clonazepam                                         | Benzodiazepines |
| Diazepam; lubricant                                | Benzodiazepines |
| Gabapentin                                         | Anticonvulsants |

---

|                                                                         |                 |
|-------------------------------------------------------------------------|-----------------|
| Gabapentin Enacarbil                                                    | Anticonvulsants |
| Gabapentin; gabapentin                                                  | Anticonvulsants |
| Pregabalin                                                              | Anticonvulsants |
| <br>                                                                    |                 |
| Pramipexole Dihydrochloride                                             | Dopaminergic    |
| Ropinirole Hcl; ropinirole Hcl; ropinirole HclPregabalin                | Dopaminergic    |
| Ropinirole Hydrochloride Ropinirole Hcl; ropinirole Hcl; ropinirole Hcl | Dopaminergic    |
| RotigotineRopinirole Hydrochloride                                      | Dopaminergic    |
| Rotigotine                                                              | Dopaminergic    |
| <br>                                                                    |                 |
| Pergolide (Permax)                                                      | Ergot-dopamine  |
| bromocriptine (Parlodel)                                                | Ergot-dopamine  |
| cabergoline (Dostinex)                                                  | Ergot-dopamine  |

---

**Table S3. Hazard ratios (HRs) for the future development of different cardiovascular diseases (CVDs) when the RLS with treatment group and the RLS without treatment group were each individually compared to the group with no RLS.**

| Individual cardiovascular disease             | No RLS   | RLS with treatment   | RLS without treatment |
|-----------------------------------------------|----------|----------------------|-----------------------|
| Myocardial infarction                         | 1 (Ref.) | 1.25(1.05, 1.50)*    | 1.32(0.97, 1.79)      |
| Angina                                        | 1 (Ref.) | 1.43(1.30, 1.58)***  | 1.45(1.23, 1.71)***   |
| Other forms of chronic ischemic heart disease | 1 (Ref.) | 1.35(1.25, 1.46) *** | 1.57(1.38, 1.77) ***  |
| Coronary artery bypass grafting               | 1 (Ref.) | 1.25(1.06, 1.48)**   | 1.45(1.11, 1.89)**    |
| Coronary Artery disease                       | 1 (Ref.) | 1.35(1.25, 1.46) *** | 1.57(1.38, 1.77) ***  |
| Percutaneous coronary intervention            | 1 (Ref.) | 1.17(0.86, 1.60)     | 0.56 (0.28, 1.15)     |
| Atrial fibrillation                           | 1 (Ref.) | 1.17(1.03, 1.32)*    | 1.88(1.58, 2.25)***   |
| Heart failure                                 | 1 (Ref.) | 1.46(1.29, 1.65) *** | 1.90(1.57, 2.31) ***  |
| Ischemic stroke                               | 1 (Ref.) | 1.26(1.14, 1.38) *** | 1.39(1.19, 1.62) ***  |
| Hemorrhagic stroke                            | 1 (Ref.) | 0.98(0.69, 1.38)     | 1.10(0.63, 1.91)      |
| Subarachnoid hemorrhage                       | 1 (Ref.) | 1.48(0.92, 2.38)     | 1.74(0.83, 3.67)      |
| Other or unspecified stroke                   | 1 (Ref.) | 1.51(1.32, 1.72) *** | 1.77(1.44, 2.18) ***  |

adjusted for age, sex, residence (rural vs Urban), region (east, south, Midwest, and unknown), alcohol consumption, presence of obesity, COPD, diabetes, hypertension, hyperlipidemia, sleep Apnea, depression, insomnia, peripheral neuropathy, Rheumatic arthritics, Osteoarthritis, CKD, Iron deficiency anemia, or Parkinson disease (each, yes/no), and use of antiplatelets, anticoagulants, statins, antihypertensives and hypoglycemic treatment (each, yes/no).

\* P<0.05 \*\* P<0.01 \*\*\* P<0.001, relative to No RLS

Restless legs syndrome, RLS; Chronic kidney disease, CKD; Chronic obstructive pulmonary disease, COPD; cardiovascular disease, CVD

**Table S4. HRs for the development of future CVD when the RLS with treatment group and the RLS without treatment group were each individually compared to the group with no RLS stratified by sex.**

|            | No RLS | RLS with treatment | RLS without treatment | P-interaction |
|------------|--------|--------------------|-----------------------|---------------|
| <b>Sex</b> |        |                    |                       | 0.04          |
| Men        | 1(ref) | 1.22 (1.12, 1.32)* | 1.37 (1.21, 1.55)*    |               |
| Women      | 1(ref) | 1.29 (1.21, 1.36)* | 1.64 (1.50, 1.80)*    |               |

adjusted for age (y), residence (rural vs Urban), region (east, south, Midwest, and unknown), alcohol consumption, presence of obesity, COPD, diabetes, hypertension, hyperlipidemia, sleep Apnea, depression, insomnia, peripheral neuropathy, Rheumatic arthritics, Osteoarthritis, CKD, Iron deficiency anemia, or Parkinson disease (each, yes/no), and use of antiplatelets, anticoagulants, statins, antihypertensives and hypoglycemic treatment (each, yes/no).

\* P<0.001, relative to the No RLS group

Restless legs syndrome, RLS; Chronic kidney disease, CKD; Chronic obstructive pulmonary disease, COPD; cardiovascular disease, CVD
